# Supplementary material
Source: MDPI journal article supplement (https://www.mdpi.com/2072-4292/12/5/817)
Supplement: s1 [file s1]

# Supplementary Material

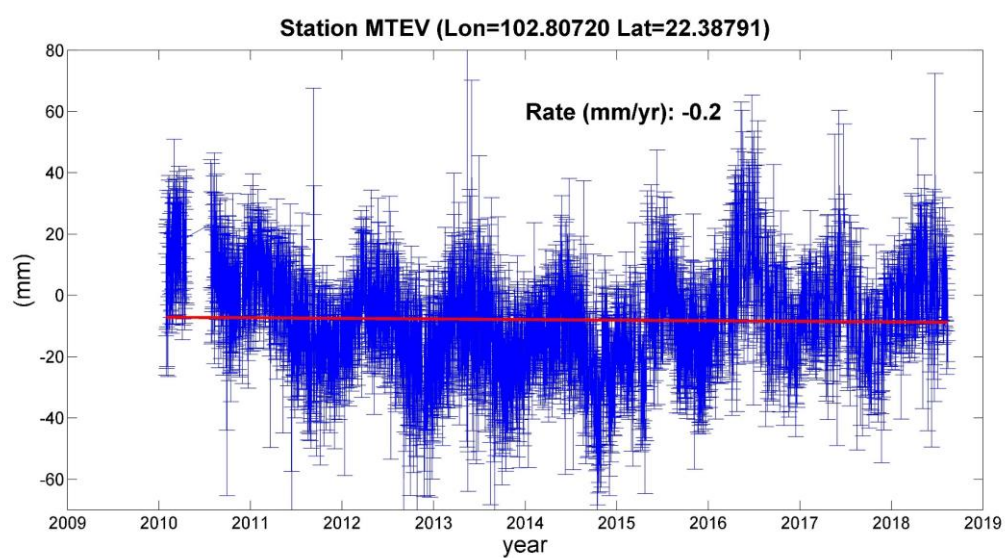

(a)

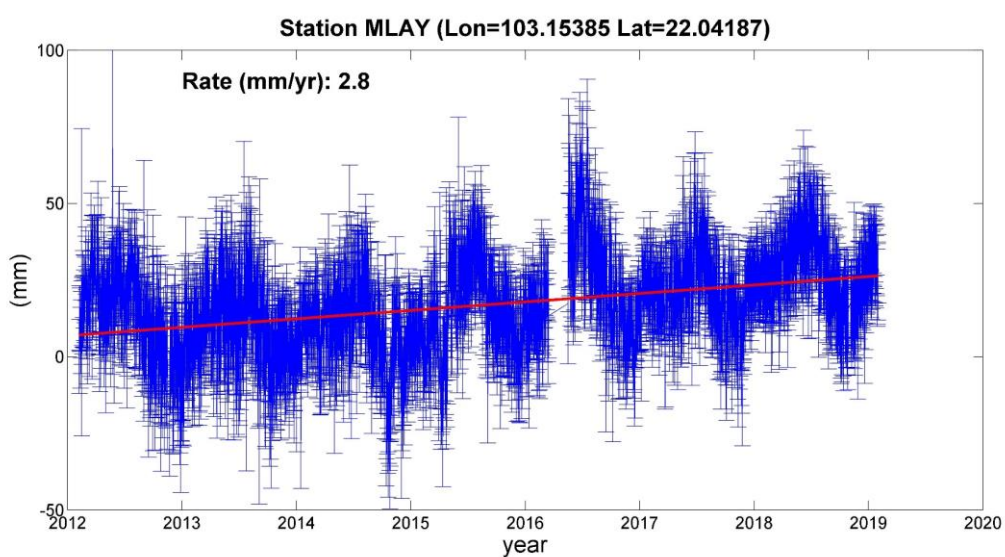

(b)

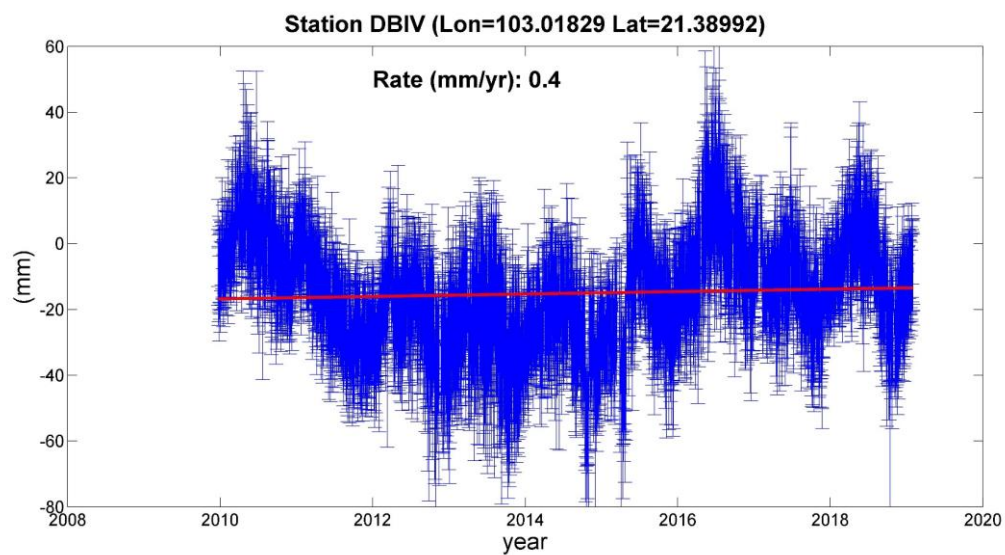

(c)

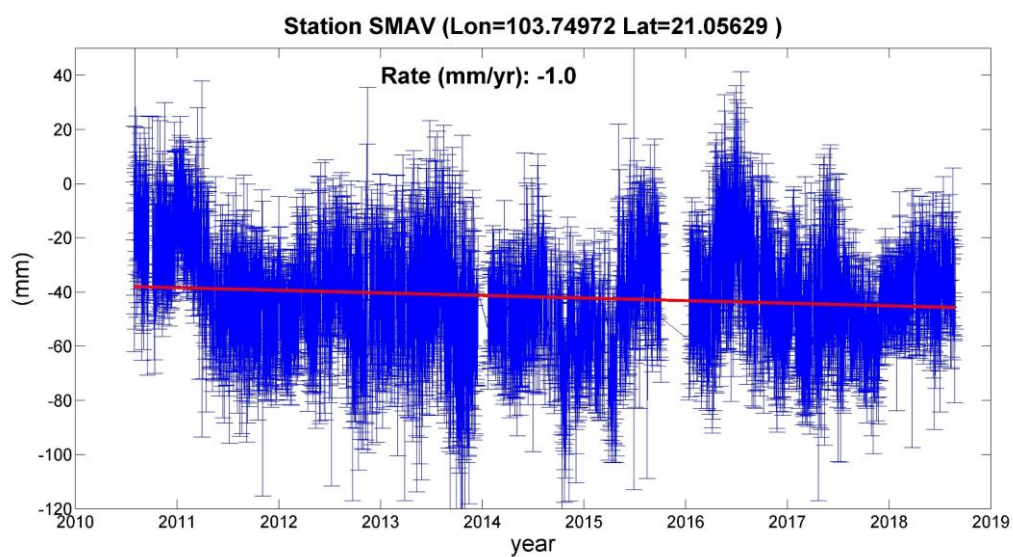

(d)

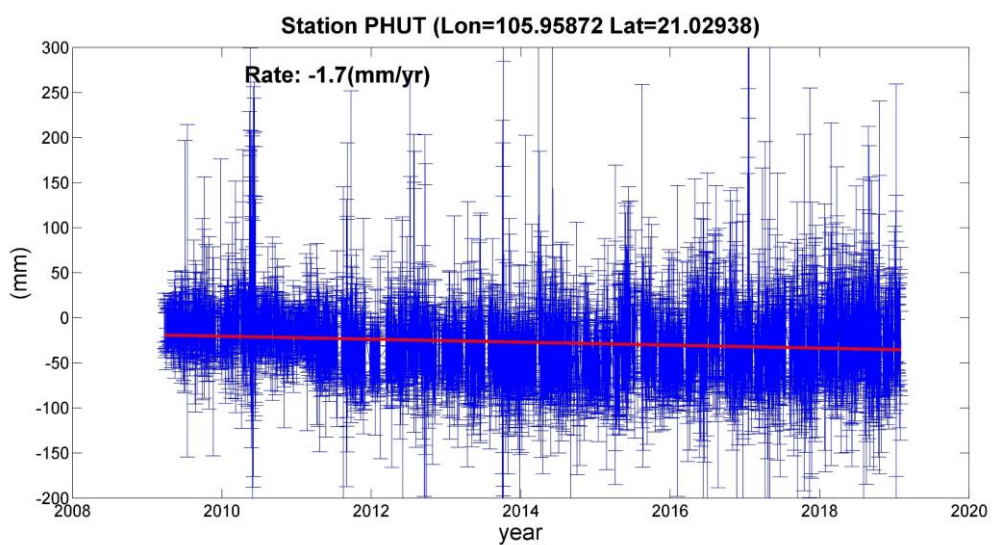

(e)

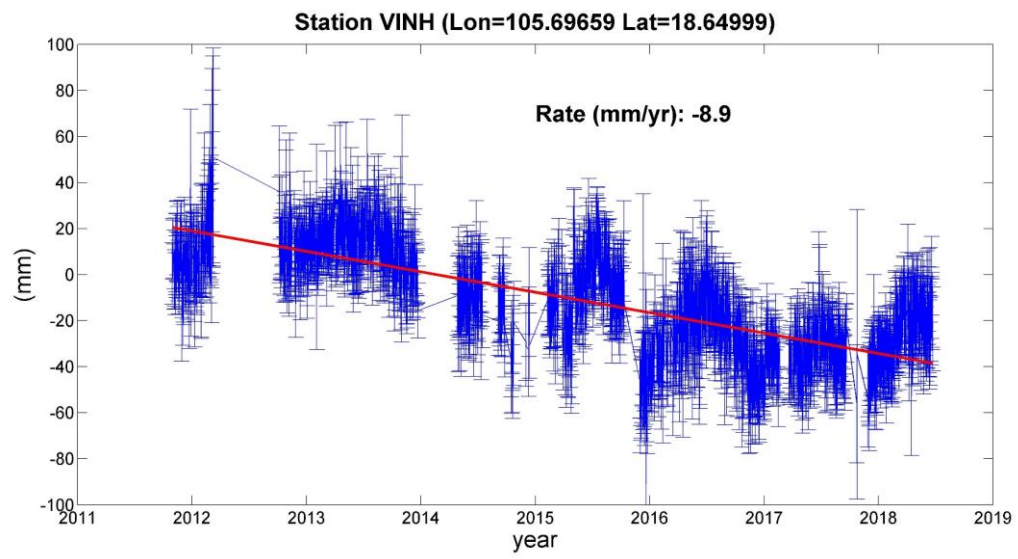

(f)

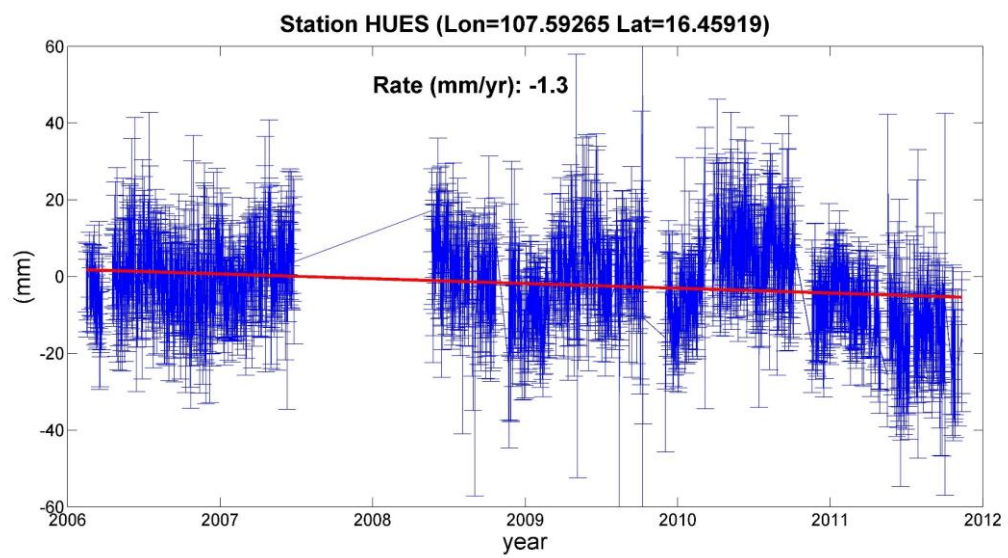

(g)

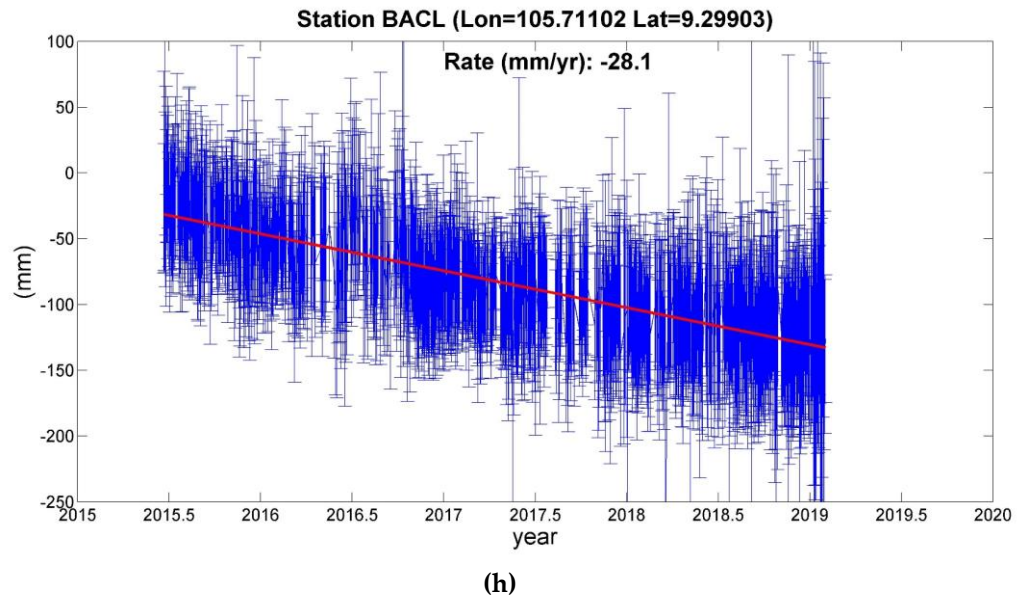

**Figure S1.** Time-series of heights plots of 8 stations provided by the Institute of Geophysics (IGP) – Vietnam Academy of Science and Technology (VAST) (a) MTEV station; (b) MLAY station; (c) DBIV station; (d) SMAV station; (e) PHUT station; (f) VINH station; (g) HUES station and (h) BACL station.

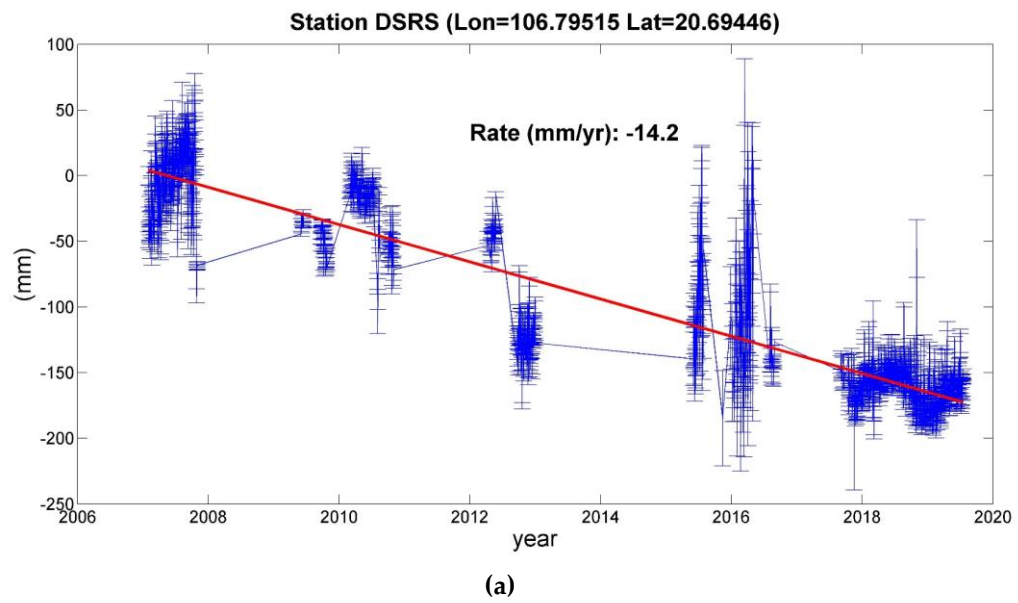

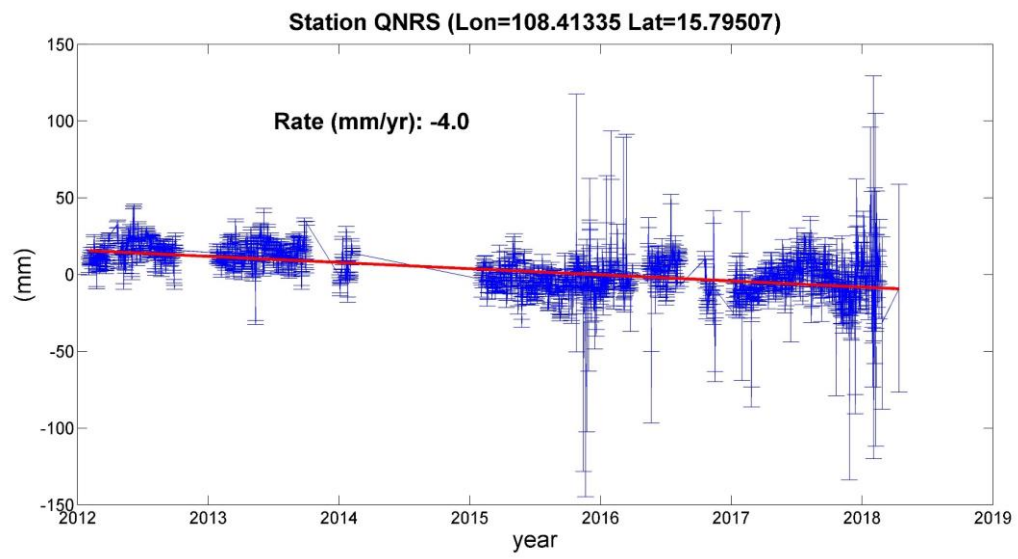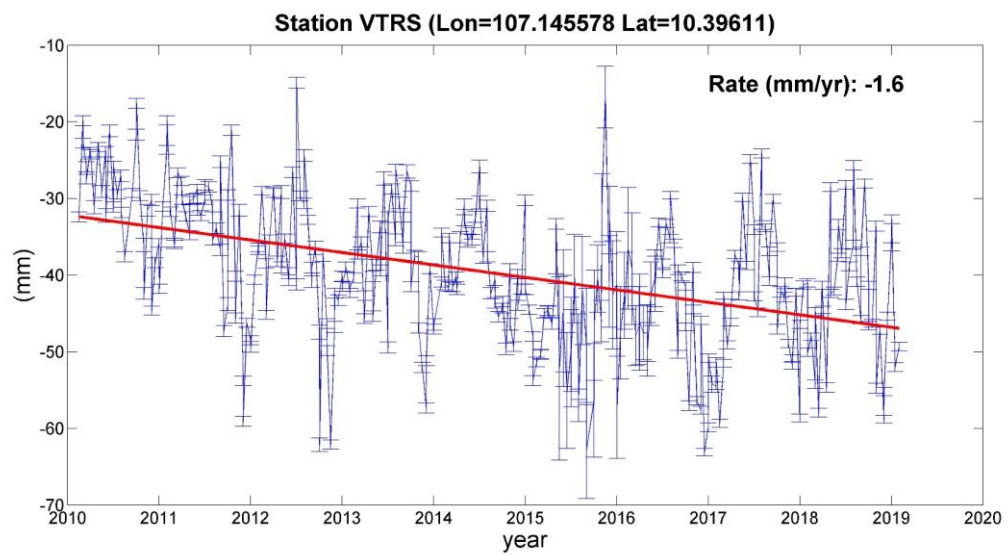

**Figure S2.** Time-series of heights plots of 3 stations provided by the Vietnam Department of Surveying and Mapping (VDSM) (a) DSRS station; (b) QNRS station and (c) VTRS station.
